# Supplementary material
Source: publisher figshare collection journal article supplement (https://acs.figshare.com/ndownloader/files/3942604)
Supplement: Supplementary file 1 [file 3942604]

data_global
_audit_creation_method                  'APEX2 v2010.9-1'

_publ_requested_journal                 ?

_publ_contact_author_name               ?
_publ_contact_author_address            
;
;
_publ_contact_author_email              ?
_publ_contact_author_fax                ?
_publ_contact_author_phone              ?

_publ_section_title                     
;
;
_publ_section_abstract                  
;
;
_publ_section_references                
;
;
_publ_section_comment                   
;
;

data_I
_chemical_name_systematic               ?
_chemical_name_common                   APE2
_chemical_formula_moiety                ?
_chemical_formula_sum                   'C17 H14 Br N3 O2'
_chemical_formula_iupac                 ?
_chemical_formula_weight                372.22
_chemical_absolute_configuration        rmad

_chemical_melting_point                 ?

_space_group_crystal_system             monoclinic
_space_group_name_H-M_alt               'P 1 21 1'
_space_group_name_Hall                  'P 2yb'
loop_
    _space_group_symop_operation_xyz
    'x, y, z'
    '-x, y+1/2, -z'

_cell_length_a                          6.0087(4)
_cell_length_b                          17.4567(9)
_cell_length_c                          15.2518(12)
_cell_angle_alpha                       90
_cell_angle_beta                        91.114(2)
_cell_angle_gamma                       90
_cell_volume                            1599.49(18)
_cell_formula_units_Z                   4
_cell_measurement_reflns_used           2401
_cell_measurement_theta_min             2.9153
_cell_measurement_theta_max             18.6913
_cell_measurement_temperature           296.(2)

_exptl_crystal_description              plate
_exptl_crystal_colour                   'clear colourless'
_exptl_crystal_size_max                 0.450
_exptl_crystal_size_mid                 0.200
_exptl_crystal_size_min                 0.040
_exptl_crystal_density_diffrn           1.546
_exptl_crystal_density_meas             ?
_exptl_crystal_density_method           'not measured'
_exptl_crystal_F_000                    752

_exptl_absorpt_coefficient_mu           2.583
_exptl_absorpt_correction_type          multi-scan
_exptl_absorpt_process_details          sadabs
_exptl_absorpt_correction_T_min         0.73
_exptl_absorpt_correction_T_max         0.90

_exptl_special_details                  
;
; 

_diffrn_ambient_temperature             296.(2)

_diffrn_source                          ?
_diffrn_source_type                     ?

_diffrn_radiation_type                  ?
_diffrn_radiation_wavelength            0.71073
_diffrn_radiation_monochromator         ?

_diffrn_measurement_device_type         ?
_diffrn_measurement_method              ?

_diffrn_detector_area_resol_mean        8.3333

_diffrn_reflns_number                   14467
_diffrn_reflns_av_R_equivalents         0.0532
_diffrn_reflns_av_sigmaI/netI           0.0844
_diffrn_reflns_theta_min                1.34
_diffrn_reflns_theta_max                25.35
_diffrn_reflns_theta_full               25.35
_diffrn_measured_fraction_theta_max     0.987
_diffrn_measured_fraction_theta_full    0.987
_diffrn_reflns_limit_h_min              -7
_diffrn_reflns_limit_h_max              7
_diffrn_reflns_limit_k_min              -20
_diffrn_reflns_limit_k_max              20
_diffrn_reflns_limit_l_min              -18
_diffrn_reflns_limit_l_max              18

_refine_special_details                 
;
Refinement of F^2^ against ALL reflections.  The weighted R-factor wR and
goodness of fit S are based on F^2^, conventional R-factors R are based
on F, with F set to zero for negative F^2^. The threshold expression of
F^2^ > 2sigma(F^2^) is used only for calculating R-factors(gt) etc. and is
not relevant to the choice of reflections for refinement.  R-factors based
on F^2^ are statistically about twice as large as those based on F, and R-
factors based on ALL data will be even larger.
;

_reflns_number_total                    5540
_reflns_number_gt                       3015
_reflns_threshold_expression            >2sigma(I)

_refine_ls_structure_factor_coef        Fsqd
_refine_ls_matrix_type                  full
_refine_ls_R_factor_all                 0.1224
_refine_ls_R_factor_gt                  0.0541
_refine_ls_wR_factor_gt                 0.1331
_refine_ls_wR_factor_ref                0.1830
_refine_ls_goodness_of_fit_ref          1.081
_refine_ls_restrained_S_all             1.081
_refine_ls_number_reflns                5540
_refine_ls_number_parameters            415
_refine_ls_number_restraints            13
_refine_ls_hydrogen_treatment           refxyz
_refine_ls_weighting_scheme             calc
_refine_ls_weighting_details
    'calc w=1/[\s^2^(Fo^2^)+(0.0839P)^2^+0.0000P] where P=(Fo^2^+2Fc^2^)/3'

_atom_sites_solution_hydrogens          geom
_atom_sites_solution_primary            direct
_atom_sites_solution_secondary          difmap

_refine_ls_shift/su_max                 0.000
_refine_ls_shift/su_mean                0.000
_refine_diff_density_max                0.572
_refine_diff_density_min                -0.331
_refine_ls_extinction_method            none
_refine_ls_extinction_coef              ?
_refine_ls_abs_structure_details        
    'Flack H D (1983), Acta Cryst. A39, 876-881'
_refine_ls_abs_structure_Flack          0.016(14)

loop_
    _atom_type_symbol
    _atom_type_description
    _atom_type_scat_dispersion_real
    _atom_type_scat_dispersion_imag
    _atom_type_scat_source
    C C 0.0033 0.0016 'International Tables Vol C Tables 4.2.6.8 and 6.1.1.4'
    H H 0.0000 0.0000 'International Tables Vol C Tables 4.2.6.8 and 6.1.1.4'
    N N 0.0061 0.0033 'International Tables Vol C Tables 4.2.6.8 and 6.1.1.4'
    O O 0.0106 0.0060 'International Tables Vol C Tables 4.2.6.8 and 6.1.1.4'
    Br Br -0.2901 2.4595
     'International Tables Vol C Tables 4.2.6.8 and 6.1.1.4'

_computing_data_collection              
    'Bruker Instrument Service v2010.9.0.0'
_computing_cell_refinement              'SAINT V7.68A (Bruker AXS, 2009)'
_computing_data_reduction               'SAINT V7.68A (Bruker AXS, 2009)'
_computing_structure_solution           'SHELXS-97 (Sheldrick, 2008)'
_computing_structure_refinement         'SHELXL-97 (Sheldrick, 2008)'
_computing_molecular_graphics           ?
_computing_publication_material         ?

loop_
    _atom_site_type_symbol
    _atom_site_label
    _atom_site_fract_x
    _atom_site_fract_y
    _atom_site_fract_z
    _atom_site_U_iso_or_equiv
    _atom_site_adp_type
    _atom_site_calc_flag
    _atom_site_refinement_flags
    _atom_site_occupancy
    _atom_site_disorder_assembly
    _atom_site_disorder_group
    Br Br1 0.0069(3) 0.90386(7) 0.10343(8) 0.1044(5) Uani d . 1 . .
    Br Br2 0.5209(2) 0.09031(7) 0.10486(8) 0.0980(5) Uani d . 1 . .
    C C1 -0.0332(18) 0.8914(6) 0.2265(7) 0.057(3) Uani d . 1 . .
    C C2 -0.2286(17) 0.9157(6) 0.2628(7) 0.067(3) Uani d . 1 . .
    H H2 -0.3402 0.9365 0.227 0.08 Uiso calc R 1 . .
    C C3 -0.2598(14) 0.9097(5) 0.3504(6) 0.049(2) Uani d . 1 . .
    H H3 -0.3926 0.9254 0.375 0.058 Uiso calc R 1 . .
    C C4 -0.0904(14) 0.8796(5) 0.4023(6) 0.042(2) Uani d . 1 . .
    C C5 0.1091(15) 0.8555(5) 0.3669(8) 0.056(3) Uani d . 1 . .
    H H5 0.2221 0.835 0.4023 0.067 Uiso calc R 1 . .
    C C6 0.1348(16) 0.8629(6) 0.2765(8) 0.061(3) Uani d . 1 . .
    H H6 0.2674 0.8482 0.2509 0.073 Uiso calc R 1 . .
    C C7 -0.2875(13) 0.8466(5) 0.5404(7) 0.044(2) Uani d . 1 . .
    C C8 -0.2581(12) 0.8633(4) 0.6366(6) 0.038(2) Uani d . 1 . .
    H H8 -0.3711 0.8994 0.6566 0.046 Uiso calc R 1 . .
    C C9 -0.0238(13) 0.8980(5) 0.6447(7) 0.046(2) Uani d . 1 . .
    H H9 -0.0192 0.9442 0.6814 0.055 Uiso calc R 1 . .
    C C10 0.0433(13) 0.9132(5) 0.5526(6) 0.041(2) Uani d . 1 . .
    C C11 0.1215(13) 0.8283(5) 0.6861(6) 0.047(2) Uani d . 1 . .
    H H11 0.2454 0.8179 0.6469 0.057 Uiso calc R 1 . .
    C C12 -0.2509(13) 0.7913(5) 0.6940(6) 0.045(2) Uani d . 1 . .
    H H12A -0.2809 0.8039 0.7546 0.053 Uiso calc R 1 . .
    H H12B -0.3597 0.754 0.6735 0.053 Uiso calc R 1 . .
    C C13 0.2171(11) 0.8494(5) 0.7751(5) 0.0471(19) Uani d . 1 . .
    C C14 0.2006(15) 0.8004(5) 0.8459(6) 0.064(2) Uani d . 1 . .
    H H14 0.121 0.7549 0.8405 0.077 Uiso calc R 1 . .
    C C15 0.3004(19) 0.8190(6) 0.9228(8) 0.087(3) Uani d . 1 . .
    H H15 0.2899 0.787 0.9713 0.105 Uiso calc R 1 . .
    C C16 0.4127(18) 0.8832(8) 0.9277(7) 0.089(4) Uani d . 1 . .
    H H16 0.4841 0.8969 0.98 0.107 Uiso calc R 1 . .
    C C17 0.4257(19) 0.9312(7) 0.8549(8) 0.090(4) Uani d . 1 . .
    H H17 0.5069 0.9764 0.8603 0.109 Uiso calc R 1 . .
    C C18 0.4737(16) 0.0956(7) 0.2263(6) 0.061(3) Uani d . 1 . .
    C C19 0.2751(15) 0.0706(5) 0.2607(7) 0.058(3) Uani d . 1 . .
    H H19 0.161 0.0534 0.2237 0.069 Uiso calc R 1 . .
    C C20 0.2470(14) 0.0715(5) 0.3517(7) 0.053(3) Uani d . 1 . .
    H H20 0.115 0.0537 0.3752 0.063 Uiso calc R 1 . .
    C C21 0.4156(12) 0.0988(5) 0.4068(6) 0.042(2) Uani d . 1 . .
    C C22 0.6136(13) 0.1233(4) 0.3684(8) 0.048(3) Uani d . 1 . .
    H H22 0.7278 0.1411 0.4051 0.058 Uiso calc R 1 . .
    C C23 0.6470(15) 0.1226(6) 0.2818(8) 0.056(3) Uani d . 1 . .
    H H23 0.7808 0.1393 0.2589 0.067 Uiso calc R 1 . .
    C C25 0.5368(15) 0.0639(5) 0.5566(6) 0.048(2) Uani d . 1 . .
    C C26 0.4603(12) 0.0837(5) 0.6451(6) 0.045(2) Uani d . 1 . .
    H H26 0.4648 0.0383 0.6829 0.054 Uiso calc R 1 . .
    C C27 0.2246(13) 0.1126(5) 0.6356(7) 0.051(2) Uani d . 1 . .
    H H27 0.1153 0.0738 0.6522 0.061 Uiso calc R 1 . .
    C C28 0.2038(15) 0.1339(5) 0.5395(7) 0.050(3) Uani d . 1 . .
    C C29 0.2200(14) 0.1815(6) 0.6950(7) 0.060(3) Uani d . 1 . .
    H H29 0.1094 0.2177 0.6715 0.072 Uiso calc R 1 . .
    C C30 0.5891(14) 0.1486(5) 0.6881(7) 0.062(3) Uani d . 1 . .
    H H30A 0.6326 0.1348 0.7477 0.074 Uiso calc R 1 . .
    H H30B 0.7224 0.1596 0.6556 0.074 Uiso calc R 1 . .
    C C31 0.1646(14) 0.1645(6) 0.7895(7) 0.070(2) Uani d U 1 . .
    C C32 0.238(3) 0.2115(8) 0.8574(8) 0.126(5) Uani d U 1 . .
    H H32 0.3281 0.2536 0.846 0.151 Uiso calc R 1 . .
    C C33 0.178(4) 0.1952(10) 0.9402(10) 0.155(7) Uani d U 1 . .
    H H33 0.2223 0.2263 0.9868 0.186 Uiso calc R 1 . .
    C C34 0.055(3) 0.1335(11) 0.9528(10) 0.145(6) Uani d U 1 . .
    H H34 0.0086 0.123 1.0094 0.174 Uiso calc R 1 . .
    C C35 -0.0098(19) 0.0827(12) 0.8848(10) 0.133(6) Uani d U 1 . .
    H H35 -0.0884 0.038 0.8961 0.159 Uiso calc R 1 . .
    N N1 -0.1102(11) 0.8776(4) 0.4956(5) 0.0398(18) Uani d . 1 . .
    N N2 -0.0245(10) 0.7616(4) 0.6855(5) 0.050(2) Uani d . 1 . .
    H H2A 0.0145 0.7143 0.6812 0.061 Uiso calc R 1 . .
    N N3 0.3282(11) 0.9155(4) 0.7786(4) 0.0608(18) Uani d . 1 . .
    N N4 0.3881(10) 0.1007(4) 0.4972(5) 0.0393(16) Uani d . 1 . .
    N N5 0.4405(12) 0.2163(4) 0.6884(6) 0.067(2) Uani d . 1 . .
    H H5A 0.475 0.264 0.6853 0.08 Uiso calc R 1 . .
    N N6 0.0486(13) 0.1024(7) 0.8013(6) 0.112(3) Uani d U 1 . .
    O O1 -0.4356(9) 0.8097(3) 0.5035(5) 0.0536(17) Uani d . 1 . .
    O O2 0.2059(10) 0.9480(3) 0.5302(5) 0.0558(18) Uani d . 1 . .
    O O3 0.0594(8) 0.1701(3) 0.5026(5) 0.0511(16) Uani d . 1 . .
    O O4 0.6979(10) 0.0303(3) 0.5342(5) 0.0542(17) Uani d . 1 . .

loop_
    _atom_site_aniso_label
    _atom_site_aniso_U_11
    _atom_site_aniso_U_22
    _atom_site_aniso_U_33
    _atom_site_aniso_U_12
    _atom_site_aniso_U_13
    _atom_site_aniso_U_23
    Br1 0.1473(13) 0.1117(11) 0.0548(9) -0.0157(9) 0.0126(8) 0.0019(8)
    Br2 0.1167(10) 0.1174(11) 0.0601(9) -0.0122(8) 0.0041(7) 0.0002(8)
    C1 0.066(7) 0.050(6) 0.056(8) 0.005(5) 0.002(6) -0.004(5)
    C2 0.070(7) 0.069(7) 0.060(8) 0.008(6) -0.019(6) 0.005(7)
    C3 0.040(5) 0.049(5) 0.056(6) 0.003(4) 0.004(5) 0.003(6)
    C4 0.042(5) 0.036(5) 0.047(6) -0.010(4) -0.005(4) -0.004(4)
    C5 0.044(6) 0.054(6) 0.070(8) 0.008(4) 0.006(5) -0.002(6)
    C6 0.054(7) 0.068(7) 0.061(8) -0.011(5) 0.009(6) -0.007(6)
    C7 0.021(4) 0.036(5) 0.074(7) -0.004(4) 0.004(4) -0.009(5)
    C8 0.029(4) 0.024(4) 0.062(6) 0.002(3) 0.012(4) -0.004(4)
    C9 0.039(5) 0.044(6) 0.055(6) -0.011(4) 0.005(4) 0.006(5)
    C10 0.035(5) 0.029(4) 0.058(6) 0.002(4) 0.006(4) -0.005(5)
    C11 0.038(4) 0.055(6) 0.050(6) 0.009(4) 0.003(4) 0.005(4)
    C12 0.042(5) 0.042(5) 0.050(6) -0.010(4) 0.003(4) -0.002(4)
    C13 0.037(4) 0.064(5) 0.042(5) 0.007(4) 0.013(3) -0.003(4)
    C14 0.082(6) 0.064(5) 0.045(6) 0.007(5) -0.002(5) -0.001(5)
    C15 0.112(9) 0.077(7) 0.073(8) -0.007(7) -0.003(7) -0.003(6)
    C16 0.072(7) 0.158(12) 0.036(6) 0.022(7) -0.011(5) 0.005(7)
    C17 0.086(8) 0.112(9) 0.072(8) -0.018(6) -0.018(6) -0.013(7)
    C18 0.066(7) 0.061(6) 0.055(7) 0.023(6) 0.001(5) 0.007(6)
    C19 0.045(6) 0.051(6) 0.076(9) -0.004(4) -0.012(5) -0.002(6)
    C20 0.043(5) 0.039(5) 0.075(8) -0.008(4) -0.008(5) 0.007(5)
    C21 0.035(5) 0.028(4) 0.062(7) 0.000(4) 0.001(4) 0.000(5)
    C22 0.031(5) 0.035(5) 0.078(8) 0.008(3) -0.002(5) 0.006(5)
    C23 0.046(6) 0.062(7) 0.060(8) -0.005(4) 0.007(5) 0.003(5)
    C25 0.041(5) 0.049(6) 0.055(7) 0.003(4) -0.011(5) -0.001(5)
    C26 0.038(5) 0.044(5) 0.054(6) 0.007(4) -0.006(4) 0.012(5)
    C27 0.044(5) 0.046(6) 0.061(7) 0.006(4) -0.004(4) 0.007(5)
    C28 0.039(6) 0.048(5) 0.065(7) -0.018(4) 0.001(5) -0.007(5)
    C29 0.038(5) 0.062(6) 0.081(8) 0.011(4) -0.009(5) 0.001(5)
    C30 0.035(5) 0.073(7) 0.077(8) 0.013(5) -0.008(5) 0.003(6)
    C31 0.051(5) 0.092(7) 0.067(6) 0.021(4) -0.002(4) 0.014(5)
    C32 0.210(15) 0.100(9) 0.068(7) 0.017(7) 0.005(8) -0.008(6)
    C33 0.26(2) 0.141(12) 0.065(7) 0.054(11) 0.009(10) 0.017(8)
    C34 0.115(12) 0.243(19) 0.078(8) 0.052(11) 0.006(8) 0.059(9)
    C35 0.068(7) 0.230(17) 0.101(9) -0.001(9) 0.011(8) 0.069(10)
    N1 0.034(4) 0.031(4) 0.054(5) 0.000(3) -0.008(4) -0.006(3)
    N2 0.043(4) 0.031(4) 0.077(6) 0.007(3) -0.001(4) 0.004(4)
    N3 0.055(4) 0.078(5) 0.049(4) -0.019(4) -0.002(3) -0.004(4)
    N4 0.032(4) 0.036(4) 0.050(5) 0.002(3) 0.009(3) 0.001(4)
    N5 0.056(5) 0.051(5) 0.093(7) -0.007(4) -0.006(4) -0.015(4)
    N6 0.061(5) 0.181(9) 0.093(6) -0.031(6) -0.006(4) 0.046(6)
    O1 0.039(4) 0.047(3) 0.074(5) -0.006(3) -0.011(3) 0.000(3)
    O2 0.047(4) 0.056(4) 0.065(5) -0.022(3) 0.010(3) -0.010(3)
    O3 0.028(3) 0.061(4) 0.064(4) 0.007(3) -0.003(3) 0.004(3)
    O4 0.040(3) 0.054(4) 0.068(5) 0.020(3) -0.001(3) -0.003(3)

_geom_special_details                   
;
All esds (except the esd in the dihedral angle between two l.s. planes)
are estimated using the full covariance matrix.  The cell esds are taken
into account individually in the estimation of esds in distances, angles
and torsion angles; correlations between esds in cell parameters are only
used when they are defined by crystal symmetry.  An approximate (isotropic)
treatment of cell esds is used for estimating esds involving l.s. planes.
;

loop_
    _geom_bond_atom_site_label_1
    _geom_bond_atom_site_label_2
    _geom_bond_site_symmetry_2
    _geom_bond_distance
    _geom_bond_publ_flag
    Br1 C1 . 1.910(10) ?
    Br2 C18 . 1.881(9) ?
    C1 C6 . 1.349(14) ?
    C1 C2 . 1.375(13) ?
    C2 C3 . 1.357(13) ?
    C2 H2 . 0.93 ?
    C3 C4 . 1.381(11) ?
    C3 H3 . 0.93 ?
    C4 C5 . 1.390(13) ?
    C4 N1 . 1.430(12) ?
    C5 C6 . 1.395(14) ?
    C5 H5 . 0.93 ?
    C6 H6 . 0.93 ?
    C7 O1 . 1.226(9) ?
    C7 N1 . 1.387(11) ?
    C7 C8 . 1.502(12) ?
    C8 C12 . 1.532(12) ?
    C8 C9 . 1.536(11) ?
    C8 H8 . 0.98 ?
    C9 C10 . 1.493(13) ?
    C9 C11 . 1.618(12) ?
    C9 H9 . 0.98 ?
    C10 O2 . 1.205(9) ?
    C10 N1 . 1.400(10) ?
    C11 N2 . 1.459(10) ?
    C11 C13 . 1.510(11) ?
    C11 H11 . 0.98 ?
    C12 N2 . 1.464(10) ?
    C12 H12A . 0.97 ?
    C12 H12B . 0.97 ?
    C13 N3 . 1.333(10) ?
    C13 C14 . 1.383(11) ?
    C14 C15 . 1.346(13) ?
    C14 H14 . 0.93 ?
    C15 C16 . 1.309(15) ?
    C15 H15 . 0.93 ?
    C16 C17 . 1.394(16) ?
    C16 H16 . 0.93 ?
    C17 N3 . 1.322(13) ?
    C17 H17 . 0.93 ?
    C18 C19 . 1.384(13) ?
    C18 C23 . 1.410(14) ?
    C19 C20 . 1.401(13) ?
    C19 H19 . 0.93 ?
    C20 C21 . 1.389(12) ?
    C20 H20 . 0.93 ?
    C21 N4 . 1.393(10) ?
    C21 C22 . 1.402(12) ?
    C22 C23 . 1.340(14) ?
    C22 H22 . 0.93 ?
    C23 H23 . 0.93 ?
    C25 O4 . 1.187(10) ?
    C25 N4 . 1.415(11) ?
    C25 C26 . 1.476(13) ?
    C26 C27 . 1.508(11) ?
    C26 C30 . 1.514(12) ?
    C26 H26 . 0.98 ?
    C27 C29 . 1.506(14) ?
    C27 C28 . 1.515(13) ?
    C27 H27 . 0.98 ?
    C28 O3 . 1.205(11) ?
    C28 N4 . 1.416(12) ?
    C29 N5 . 1.463(11) ?
    C29 C31 . 1.514(13) ?
    C29 H29 . 0.98 ?
    C30 N5 . 1.482(11) ?
    C30 H30A . 0.97 ?
    C30 H30B . 0.97 ?
    C31 N6 . 1.302(13) ?
    C31 C32 . 1.387(15) ?
    C32 C33 . 1.350(17) ?
    C32 H32 . 0.93 ?
    C33 C34 . 1.32(2) ?
    C33 H33 . 0.93 ?
    C34 C35 . 1.41(2) ?
    C34 H34 . 0.93 ?
    C35 N6 . 1.371(15) ?
    C35 H35 . 0.93 ?
    N2 H2A . 0.86 ?
    N5 H5A . 0.86 ?

loop_
    _geom_angle_atom_site_label_1
    _geom_angle_atom_site_label_2
    _geom_angle_atom_site_label_3
    _geom_angle_site_symmetry_1
    _geom_angle_site_symmetry_3
    _geom_angle
    _geom_angle_publ_flag
    C6 C1 C2 . . 121.5(10) ?
    C6 C1 Br1 . . 119.4(8) ?
    C2 C1 Br1 . . 119.0(8) ?
    C3 C2 C1 . . 120.5(9) ?
    C3 C2 H2 . . 119.7 ?
    C1 C2 H2 . . 119.7 ?
    C2 C3 C4 . . 118.7(9) ?
    C2 C3 H3 . . 120.7 ?
    C4 C3 H3 . . 120.7 ?
    C3 C4 C5 . . 121.6(9) ?
    C3 C4 N1 . . 120.3(8) ?
    C5 C4 N1 . . 118.0(8) ?
    C4 C5 C6 . . 118.0(9) ?
    C4 C5 H5 . . 121.0 ?
    C6 C5 H5 . . 121.0 ?
    C1 C6 C5 . . 119.8(10) ?
    C1 C6 H6 . . 120.1 ?
    C5 C6 H6 . . 120.1 ?
    O1 C7 N1 . . 122.5(9) ?
    O1 C7 C8 . . 128.3(8) ?
    N1 C7 C8 . . 109.2(7) ?
    C7 C8 C12 . . 113.6(7) ?
    C7 C8 C9 . . 104.2(7) ?
    C12 C8 C9 . . 105.2(6) ?
    C7 C8 H8 . . 111.1 ?
    C12 C8 H8 . . 111.1 ?
    C9 C8 H8 . . 111.1 ?
    C10 C9 C8 . . 104.9(8) ?
    C10 C9 C11 . . 110.2(7) ?
    C8 C9 C11 . . 102.8(6) ?
    C10 C9 H9 . . 112.7 ?
    C8 C9 H9 . . 112.7 ?
    C11 C9 H9 . . 112.7 ?
    O2 C10 N1 . . 125.1(9) ?
    O2 C10 C9 . . 126.2(8) ?
    N1 C10 C9 . . 108.6(7) ?
    N2 C11 C13 . . 114.7(7) ?
    N2 C11 C9 . . 106.2(6) ?
    C13 C11 C9 . . 111.1(7) ?
    N2 C11 H11 . . 108.2 ?
    C13 C11 H11 . . 108.2 ?
    C9 C11 H11 . . 108.2 ?
    N2 C12 C8 . . 104.8(6) ?
    N2 C12 H12A . . 110.8 ?
    C8 C12 H12A . . 110.8 ?
    N2 C12 H12B . . 110.8 ?
    C8 C12 H12B . . 110.8 ?
    H12A C12 H12B . . 108.9 ?
    N3 C13 C14 . . 123.2(8) ?
    N3 C13 C11 . . 115.3(7) ?
    C14 C13 C11 . . 121.3(8) ?
    C15 C14 C13 . . 119.5(9) ?
    C15 C14 H14 . . 120.2 ?
    C13 C14 H14 . . 120.2 ?
    C16 C15 C14 . . 118.5(11) ?
    C16 C15 H15 . . 120.8 ?
    C14 C15 H15 . . 120.8 ?
    C15 C16 C17 . . 120.4(11) ?
    C15 C16 H16 . . 119.8 ?
    C17 C16 H16 . . 119.8 ?
    N3 C17 C16 . . 123.1(11) ?
    N3 C17 H17 . . 118.5 ?
    C16 C17 H17 . . 118.5 ?
    C19 C18 C23 . . 120.7(9) ?
    C19 C18 Br2 . . 120.4(8) ?
    C23 C18 Br2 . . 118.9(8) ?
    C18 C19 C20 . . 119.6(8) ?
    C18 C19 H19 . . 120.2 ?
    C20 C19 H19 . . 120.2 ?
    C21 C20 C19 . . 120.2(9) ?
    C21 C20 H20 . . 119.9 ?
    C19 C20 H20 . . 119.9 ?
    C20 C21 N4 . . 120.6(8) ?
    C20 C21 C22 . . 117.9(10) ?
    N4 C21 C22 . . 121.6(8) ?
    C23 C22 C21 . . 123.5(9) ?
    C23 C22 H22 . . 118.2 ?
    C21 C22 H22 . . 118.2 ?
    C22 C23 C18 . . 118.2(9) ?
    C22 C23 H23 . . 120.9 ?
    C18 C23 H23 . . 120.9 ?
    O4 C25 N4 . . 123.3(9) ?
    O4 C25 C26 . . 130.4(8) ?
    N4 C25 C26 . . 106.0(8) ?
    C25 C26 C27 . . 107.4(8) ?
    C25 C26 C30 . . 114.0(8) ?
    C27 C26 C30 . . 105.2(7) ?
    C25 C26 H26 . . 110.0 ?
    C27 C26 H26 . . 110.0 ?
    C30 C26 H26 . . 110.0 ?
    C29 C27 C26 . . 103.7(7) ?
    C29 C27 C28 . . 112.6(8) ?
    C26 C27 C28 . . 103.6(7) ?
    C29 C27 H27 . . 112.1 ?
    C26 C27 H27 . . 112.1 ?
    C28 C27 H27 . . 112.1 ?
    O3 C28 N4 . . 124.3(10) ?
    O3 C28 C27 . . 128.8(9) ?
    N4 C28 C27 . . 106.9(8) ?
    N5 C29 C27 . . 105.2(8) ?
    N5 C29 C31 . . 111.3(8) ?
    C27 C29 C31 . . 115.0(9) ?
    N5 C29 H29 . . 108.3 ?
    C27 C29 H29 . . 108.3 ?
    C31 C29 H29 . . 108.3 ?
    N5 C30 C26 . . 107.2(6) ?
    N5 C30 H30A . . 110.3 ?
    C26 C30 H30A . . 110.3 ?
    N5 C30 H30B . . 110.3 ?
    C26 C30 H30B . . 110.3 ?
    H30A C30 H30B . . 108.5 ?
    N6 C31 C32 . . 123.6(11) ?
    N6 C31 C29 . . 115.0(9) ?
    C32 C31 C29 . . 121.4(10) ?
    C33 C32 C31 . . 119.0(15) ?
    C33 C32 H32 . . 120.5 ?
    C31 C32 H32 . . 120.5 ?
    C34 C33 C32 . . 118.0(18) ?
    C34 C33 H33 . . 121.0 ?
    C32 C33 H33 . . 121.0 ?
    C33 C34 C35 . . 123.3(16) ?
    C33 C34 H34 . . 118.3 ?
    C35 C34 H34 . . 118.3 ?
    N6 C35 C34 . . 116.9(17) ?
    N6 C35 H35 . . 121.5 ?
    C34 C35 H35 . . 121.5 ?
    C7 N1 C10 . . 111.7(8) ?
    C7 N1 C4 . . 125.4(7) ?
    C10 N1 C4 . . 122.7(7) ?
    C11 N2 C12 . . 106.0(6) ?
    C11 N2 H2A . . 127.0 ?
    C12 N2 H2A . . 127.0 ?
    C17 N3 C13 . . 115.3(8) ?
    C21 N4 C25 . . 122.5(7) ?
    C21 N4 C28 . . 124.7(7) ?
    C25 N4 C28 . . 112.6(8) ?
    C29 N5 C30 . . 102.4(7) ?
    C29 N5 H5A . . 128.8 ?
    C30 N5 H5A . . 128.8 ?
    C31 N6 C35 . . 118.9(13) ?
